# Supplementary material for: Application of Rapid Fluorescence Lifetime Imaging Microscopy (RapidFLIM) to Examine Dynamics of Nanoparticle Uptake in Live Cells
Source: MDPI journal article supplement (doi:10.3390/cells11040642), 2022-02-12
Supplement: s1 [file s1]

# **Application of Rapid Fluorescence Lifetime Imaging Microscopy (RapidFLIM) to examine dynamics of nanoparticle uptake in live cells**

*Aria Ahmed-Cox,<sup>1,2,3</sup> Alexander M. Macmillan,<sup>4</sup> Elvis Pandzic,<sup>4</sup> Renee M. Whan,<sup>4</sup> and Maria  
Kavallaris<sup>1,2,3\*</sup>*

<sup>1</sup> Children's Cancer Institute, Lowy Cancer Research Center, UNSW Sydney, Randwick,  
NSW 2031, Australia

<sup>2</sup> ARC Center of Excellence in Convergent Bio-Nano Science and Technology, Australian  
Center for NanoMedicine, UNSW Sydney, Sydney, NSW 2031, Australia

<sup>3</sup> School of Women and Children's Health, Faculty of Medicine and Health, UNSW Sydney,  
Sydney, NSW 2031, Australia

<sup>4</sup> Katharina Gaus Light Microscopy Facility, Mark Wainwright Analytical Center, UNSW  
Sydney, Sydney NSW, 2031, Australia

\* Corresponding author: Maria Kavallaris [m.kavallaris@ccia.unsw.edu.au](mailto:m.kavallaris@ccia.unsw.edu.au)

## Supplementary Material

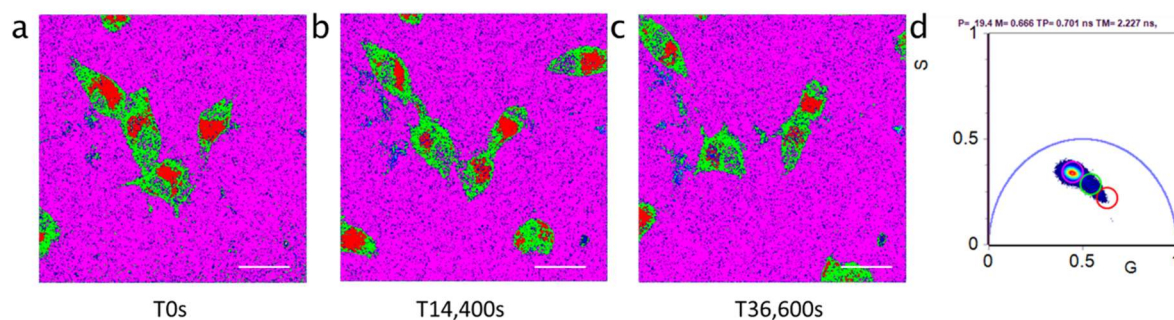

**Supplementary Figure S1** Time-lapse imaging of 100 nm silica nanoparticles (SiNP) uptake in U87 glioblastoma cells captured over 10 h (36,600 s) following SiNP addition. Representative phasor overlay for 100 nm SiNP at **(a)** time 0, **(b)** 4 h and **(c)** 10 h following SiNP addition, with **(d)** associated phasor plot and color coding (pink, long lifetime; green, intermediate lifetime; red, short lifetime). Representative of  $n = 2$ . Scale bar, 25  $\mu\text{m}$ .

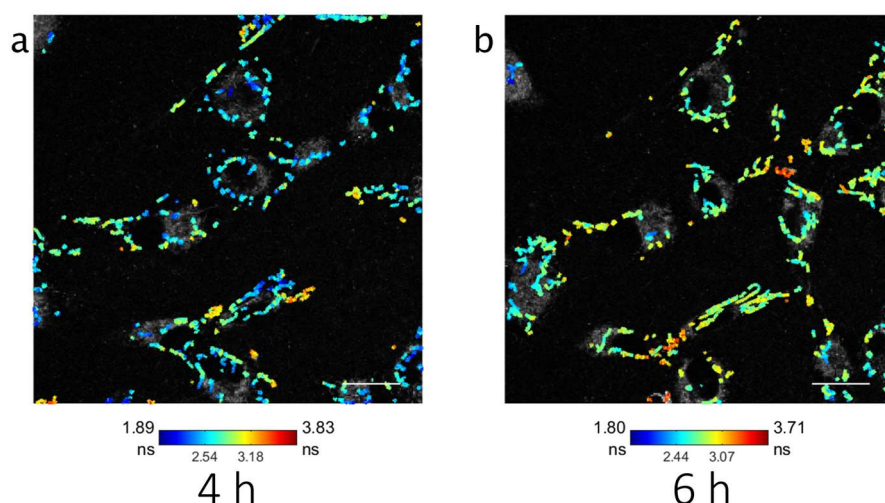

**Supplementary Figure S2** Localization of nanoparticle trajectories where the lifetime range was greater than the mean  $\Delta$  lifetime ( $x = 0.39$  ns), measured using PicoQuant RapidFLIM. Trajectories at **(a)** 4 h and **(b)** 6 h post nanoparticle addition were overlaid on the original image. Scale bar in all panels, 25  $\mu\text{m}$ .

**Supplementary Video S1** Frame by frame video of nanoparticle uptake 24 h post addition with trajectories only below the mean  $\Delta$  lifetime ( $x = 0.39$  ns), measured using PicoQuant RapidFLIM. This video can be accessed via FigShare:

Ahmed-Cox (2022) RapidFLIM Supplementary Figure S1. Available online: <https://doi.org/10.6084/m9.figshare.18094148.v1> (accessed on 12/02/2022).
